# Supplementary material for: NLRP3 Inflammasome Activates Endothelial-to-Mesenchymal Transition via Focal Adhesion Kinase Pathway in Bleomycin-Induced Pulmonary Fibrosis
Source: MDPI journal article supplement (doi:10.3390/ijms242115813), 2023-10-31
Supplement: s1 [file s1]

# Lung IHC for Ly6G

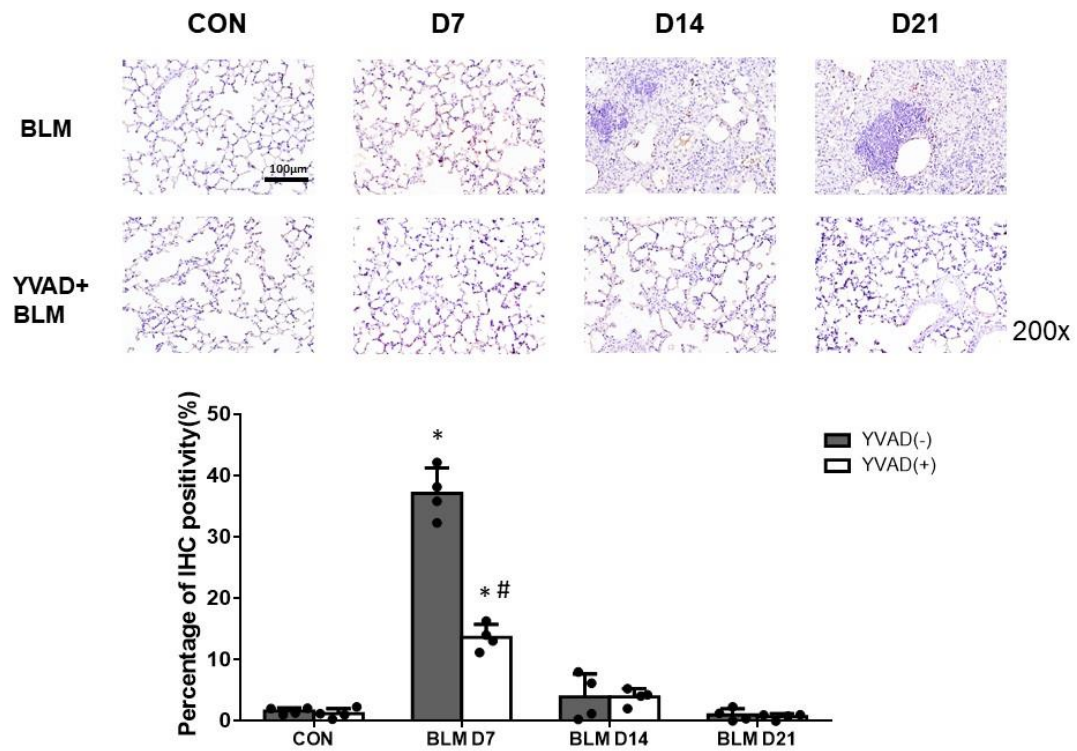

**Supplementary Figure S1.** Inhibition of NLRP3 inflammasome decreases neutrophil infiltration in mice with BLM-induced pulmonary fibrosis. IHC analysis shows that the administration of bleomycin increases Ly6G expression in lung tissues seven days after bleomycin injection, but YVAD decreases Ly6G expression. \* $P < 0.05$  compared to the control, #  $P < 0.05$  compared to the BLM group.  $n = 4$  per group.
